# Supplementary material
Source: PubMed Central journal article supplement (PMC2034217)

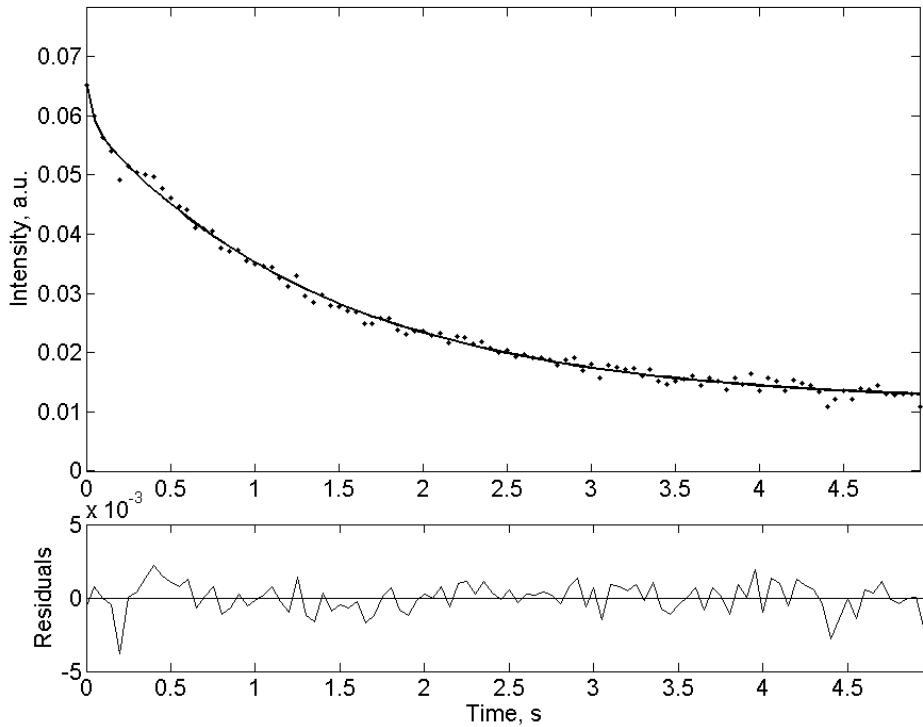

Supplement: pnas_0707061104_1.pdf [file pnas_0707061104_1.pdf]
